# Supplementary material
Source: PubMed Central journal article supplement (PMC9898158)
Supplement: NIHMS1857140-supplement-2.pdf [file NIHMS1857140-supplement-2.pdf]

**Figure S1. Analysis of the binding of TR compounds to ClpP using SPR, Related to Figure 2.**

**(A)** Raw SPR binding curves for each TR compound at varied concentrations.

**(B)** Fits of SPR data in A to the 1:1 Langmuir binding model. The obtained  $K_{ds}$  are given in each panel together with the respective errors from the fit.

Figure S1

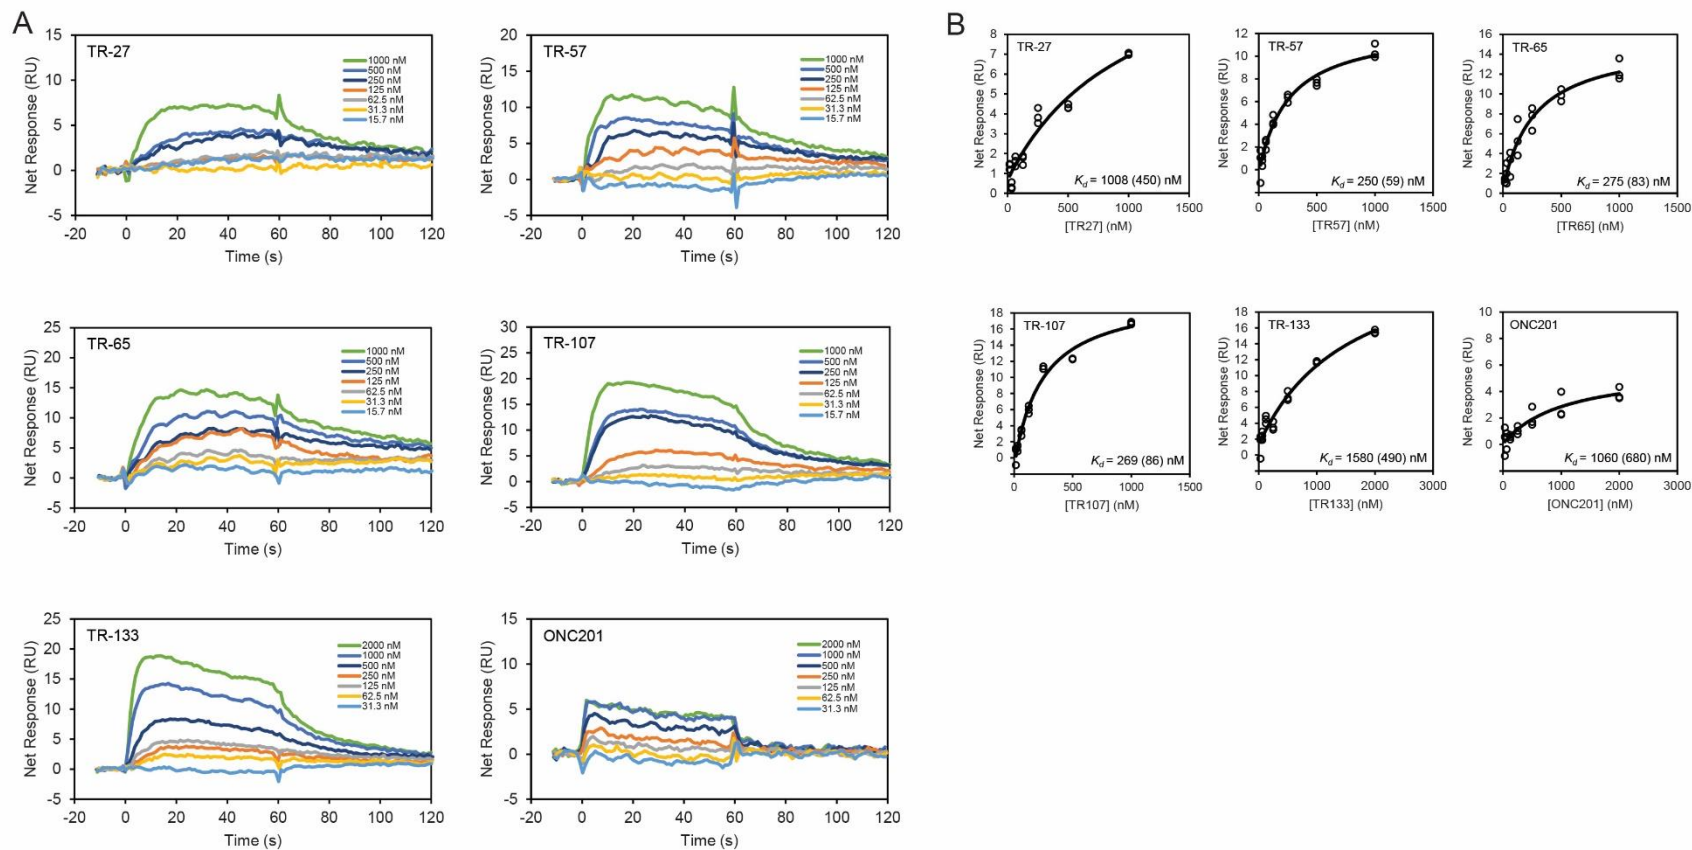

**Figure S2. The phenyl ring moieties of TR compounds exhibit shape and surface charge complementarity with the small pockets of H-sites, Related to Figure 4.**

(A) On the left panel, shown is the TR-57 bound to the H-site, whose outer boundaries are covered with surface charges. On the right panel, the chemical structure of TR-57 is shown.

(B) Shown on the left panel is a cut-away view of the TR binding cavity showing the electrostatic potential of the two small cavities where the substituted phenyl ring moieties of TR-57 bind. Not only does TR-57 have a complementary shape with the small pockets, but the additional polar halide and nitrile groups enhance its affinity for the charged pockets. The right panel is in the same orientation as the left except that the molecular surface is transparent.

(C) The left panel shows the same binding cavity as in B but rotated by 180° around the y-axis to display the electrostatic potential map of the other side of the TR binding pocket. The right panel is a transparent representation of the molecular surface on the left panel.

Figure S2

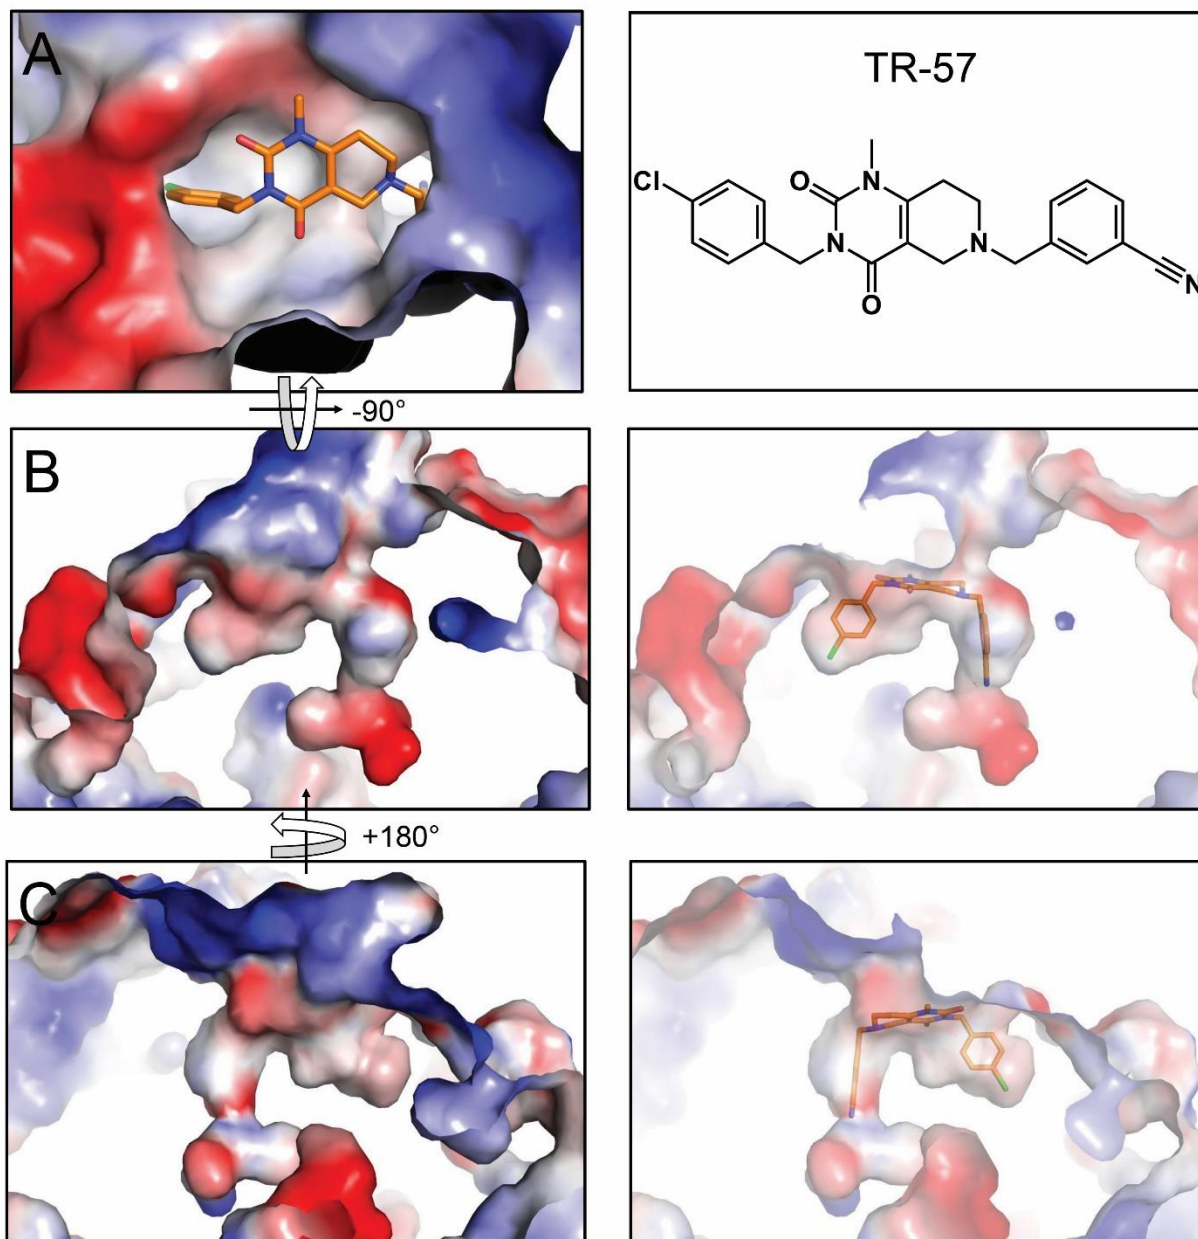

**Figure S3. Confirming the absence of apoptosis in TR-27-treated cells by light/DAPI-fluorescence microscopy and western blotting, Related to Star Methods.**

(A) Light (panels i, iv, vii and x) and DAPI-fluorescence (panels ii, v, viii and xi) microscopy and corresponding merged images (panels iii, vi, ix and xii) for MDA-MB-231 WT cells treated with 1  $\mu$ M TR-27 (panels i to iii) or DMSO (panels iv to vi) and *CLPP*<sup>-/-</sup> cells treated with 1  $\mu$ M TR-27 (panels vii to ix) or DMSO (x to xii). Drug / DMSO exposure was for 24 hours.

(B) Western blots for ClpP, ClpX, Mcl1, caspase 9, caspase 3, and caspase 8 on total cell lysates derived from MDA-MB-231 WT and *CLPP*<sup>-/-</sup> cells treated with 1  $\mu$ M TR-27 or DMSO for 24 hours. GAPDH was used as a loading control. The “pro” in the anti-caspase blots refers to the full-length inactive forms of the three caspases prior to proteolytic cleavage during apoptotic onset.

(C) Western blots of caspase 9 from total cell lysates derived from MDA-MB-231 WT and *CLPP*<sup>-/-</sup> cells treated with either 1  $\mu$ M TR-27 (vs. DMSO) for 24 hours or 2  $\mu$ M doxorubicin (vs. DMSO) for 72 hours. GAPDH was used as a loading control. “pro” refers to the full-length inactive form of caspase 9 while p37 and p35 refer to the two fragments generated after its cleavage and activation.



**Figure S4. Schematics of the experimental workflow and data analysis protocols used for the HYTANE experiments, Related to Star Methods.**

(A) Cell culturing and sample preparation. When cells were harvested, they were washed with PBS to remove residual media. 3 replicates were prepared per cell line per condition.

(B) Sample processing for HYTANE. The N- and C-termini of a protein molecule are shown as “N” and “C”, respectively. The N-terminal peptide to be isolated and analyzed is shown in purple; the rest of the protein and corresponding peptides generated after trypsin digestion (step 8) are shown in cyan. Yellow diamonds represent dimethylation of free amine groups (including the N-terminus). Red rods represent hydrophobic tags that facilitate the subsequent removal of the tagged peptides using C18 columns.

(C) Flow chart for the analysis of HYTANE data. Determination of whether an observed change in abundance of a given peptide was due to TR-27’s effect or whether it was dependent on the presence of ClpP occurs where indicated with asterisks (\*). The abundance data of both novel and native N-terminal peptides were subjected to further analysis.

(D) Scatter plots of  $\log_2$  ratios of MDA-MB-231  $CLPP^{-/-}$  with TR-27 treatment to DMSO (no drug) treatment versus the corresponding  $\log_2$  ratios for WT cells. Red data points correspond to N-terminal peptides that are deemed to show statistically significant changes in abundance in WT cells treated with TR-27 compared to DMSO with  $p < 0.05$  based on comparison of  $\log_2 [(WT + TR-27)/(WT + DMSO)]$  versus  $\log_2 [(CLPP^{-/-} + TR-27)/(CLPP^{-/-} + DMSO)]$  for each N-terminal peptide. Green data points correspond to those that are deemed to display insignificant changes with  $p \geq 0.05$ . Panels: (i)  $p < 0.05$  (red) data points and  $p \geq 0.05$  (green) data points shown together; (ii)  $p \geq 0.05$  data points only; (iii)  $p < 0.05$  data points only. Dotted line defines the trend expected when TR-27 treatment induces equal changes in peptide abundance in both WT and  $CLPP^{-/-}$ .

**Figure S4**

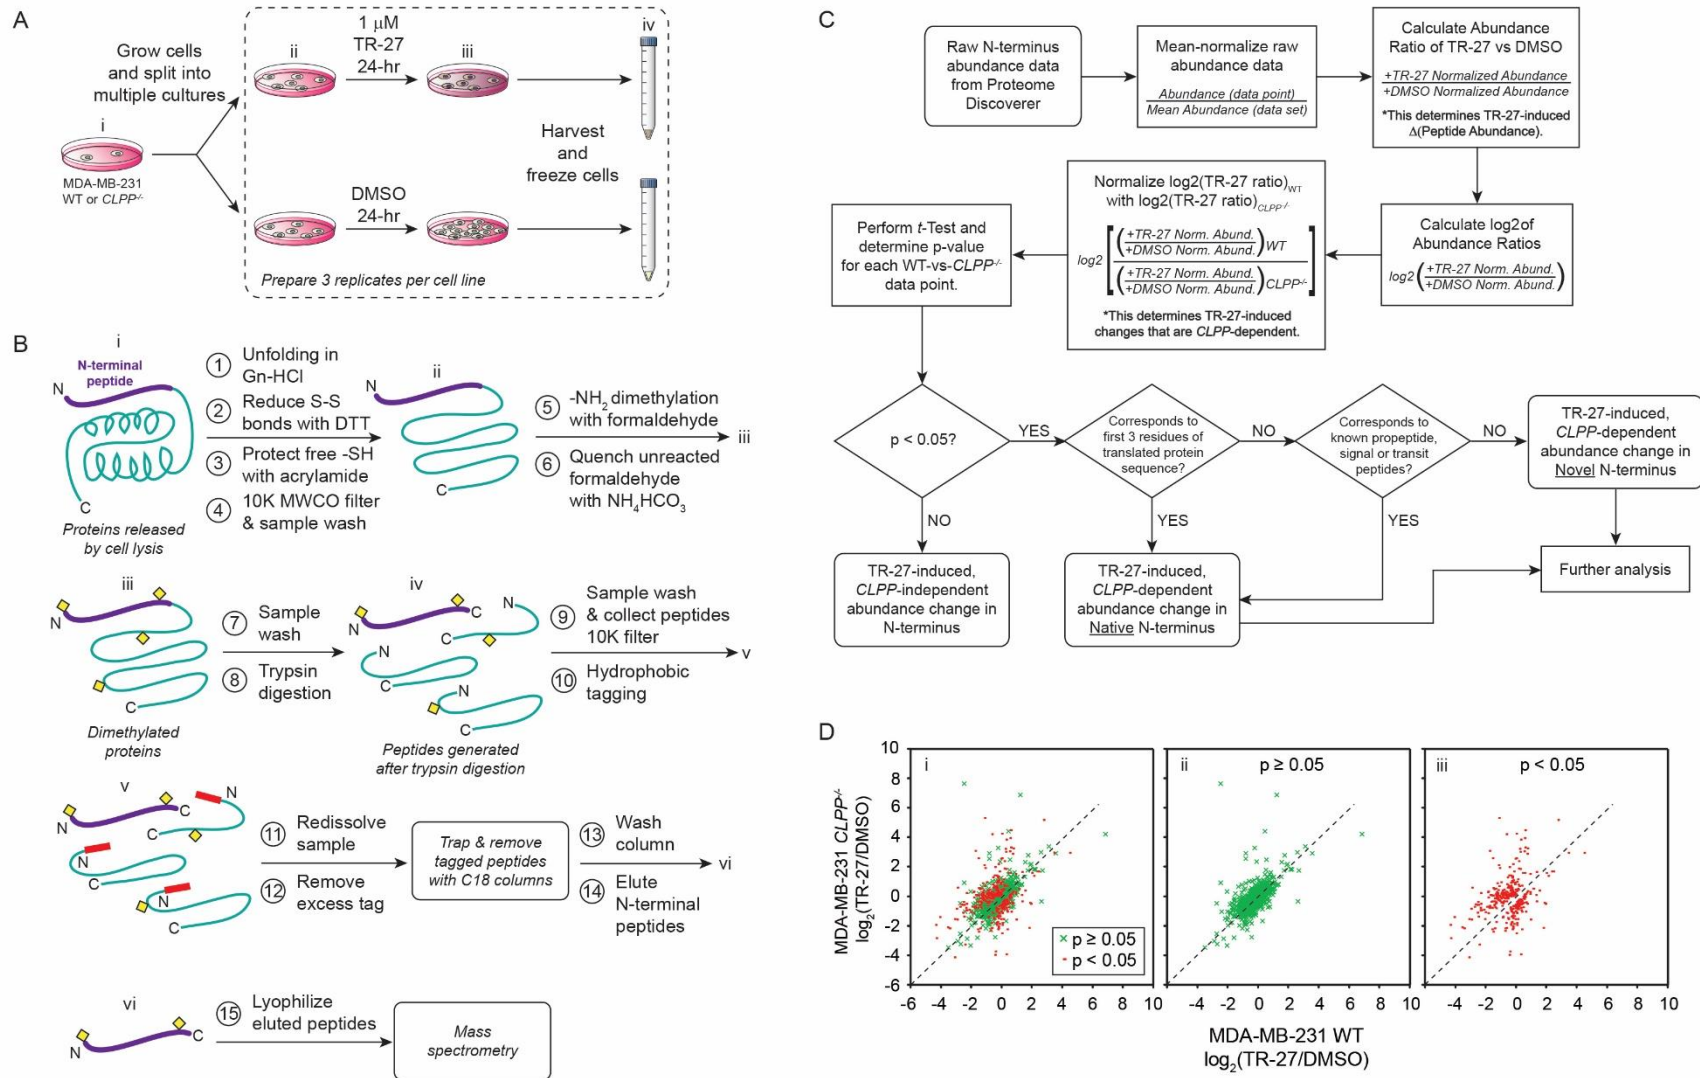



**Figure S5. TFAM and Grp75 are targeted for degradation by TR-27-activated ClpP, Related to Figures 5 and 6.**

(A) Shown are western blots analyzing the expression of TFAM and Grp75 in MDA-MB-231 WT and *CLPP*<sup>-/-</sup> cells treated with 1  $\mu$ M TR-27, 6  $\mu$ M ADEP-14, or DMSO for 24 hours. GAPDH serves as the sample loading control.

(B) Degradation of TFAM in the presence of ClpP and TR-65. Samples were collected every hour for 5 hours. Two negative controls were performed: ClpP only and TR-65 only. The blue arrow points to ClpP. The red arrow points to TFAM. Note that although TFAM has a higher MW than ClpP, it runs lower on the gel. This could be because it has a greater percent composition of arginine and lysine; as a result, TFAM would bind more SDS and traverse through the gel at a faster rate.

(C) The two bands at about 15 kDa and 9 kDa are TFAM degradation fragments generated by activated ClpP, which were subjected to N-terminal sequencing. High concentrations of ClpP and TFAM were used to achieve an abundance of degraded bands visible by eye on a Coomassie stained gel, as such the bands at about 25 kDa are composed of both TFAM and ClpP.

(D) Shown is a cartoon representation of the domains of TFAM. The two red arrows point to the two cut sites caused by activated ClpP identified by N-terminal sequencing of the bands indicated in C.

(E) Shown are the cut site in TFAM mapped onto the protein structure (PDB id 3TQ6)<sup>1</sup>. The structure was generated using PyMOL.

**Figure S5**

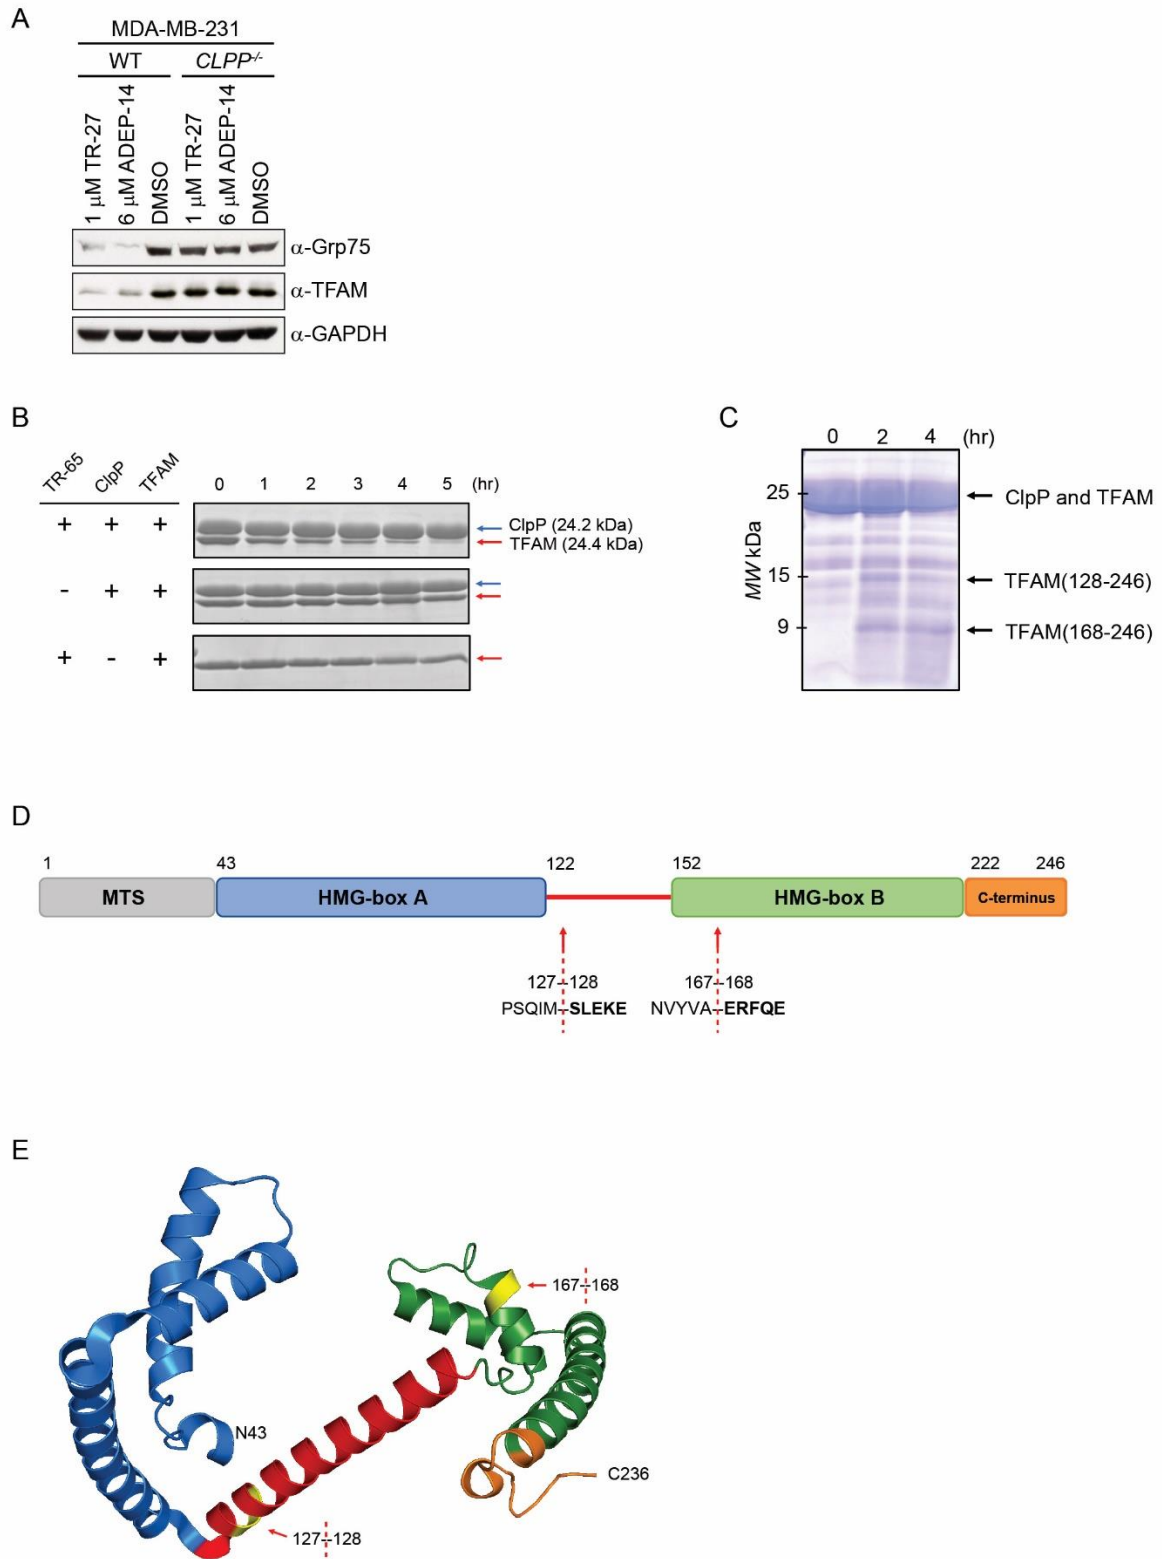

**Figure S6. Synthesis of TR-27 and TR-65, Related to Star Methods.**

Shown is a schematic for the synthesis of TR-27 and TR-65 compounds. (a)  $\text{NaBH}(\text{OAc})_3$ ,  $\text{CH}_2\text{Cl}_2$ ,  $30^\circ\text{C}/4$  h, (b)  $\text{MeI}$ ,  $\text{MeOH}$ , reflux/ $30$  min, (c) dioxane, reflux/ $12$ h, and (d)  $\text{MeONa}$ ,  $\text{MeOH}$ , reflux/ $12$  h.

Figure S6

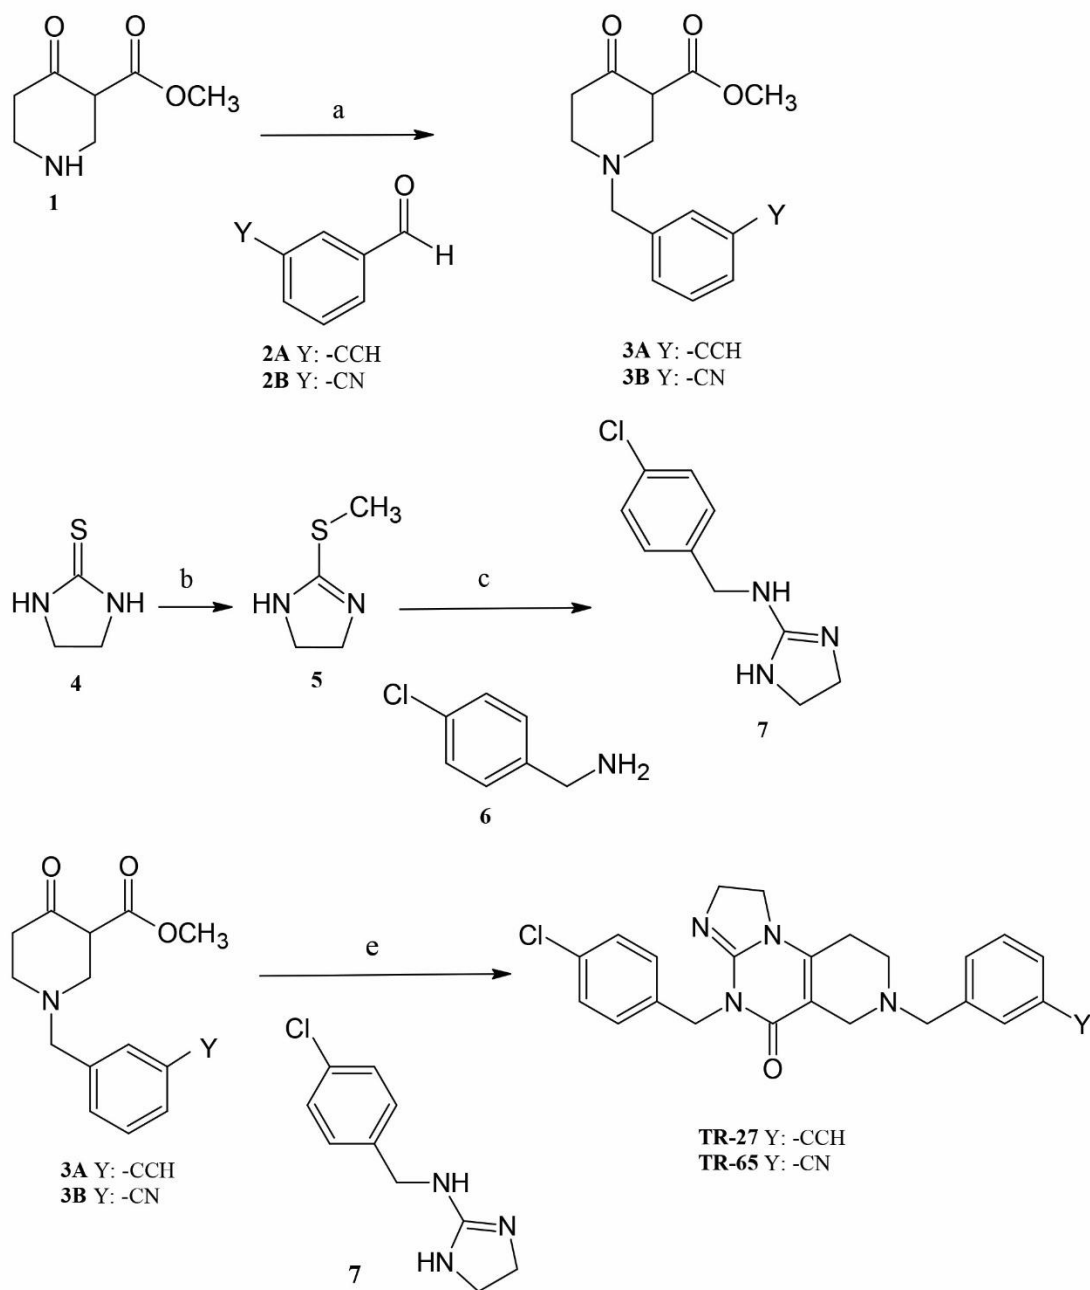

**Figure S7. Synthesis of TR-57, TR-107, and TR-133, Related to Star Methods.**

**(A)** Shown is a schematic for the synthesis of TR-57. (a) aq NH<sub>3</sub>, EtOH, Na<sub>2</sub>CO<sub>3</sub>, 70°C/4 h; (b) Et<sub>3</sub>N, toluene, 80°C/8 h and (c) MeI, DMF, 100°C/12 h.

**(B)** Shown is a schematic for the synthesis of TR-107 and TR-133. (a) CH<sub>4</sub>N<sub>2</sub>, HOAc, reflux/8 h and (b) Cs<sub>2</sub>CO<sub>3</sub>, (TR-107: pClBnBr, TR-133: pBrBnBr), THF, reflux/12 h.

Figure S7

A

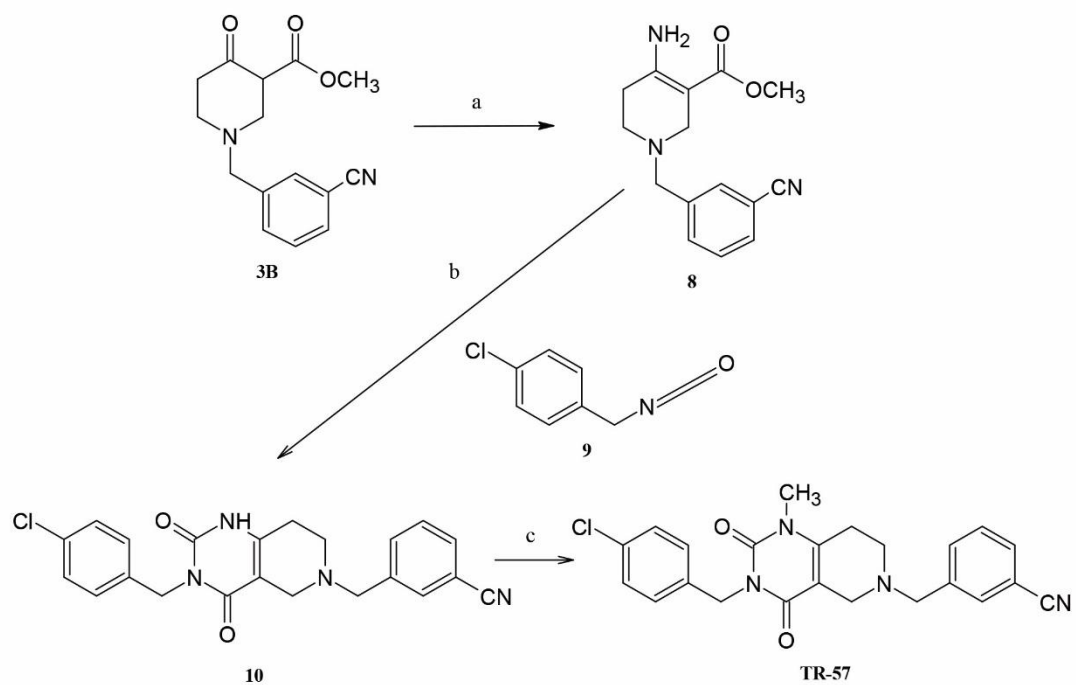

B

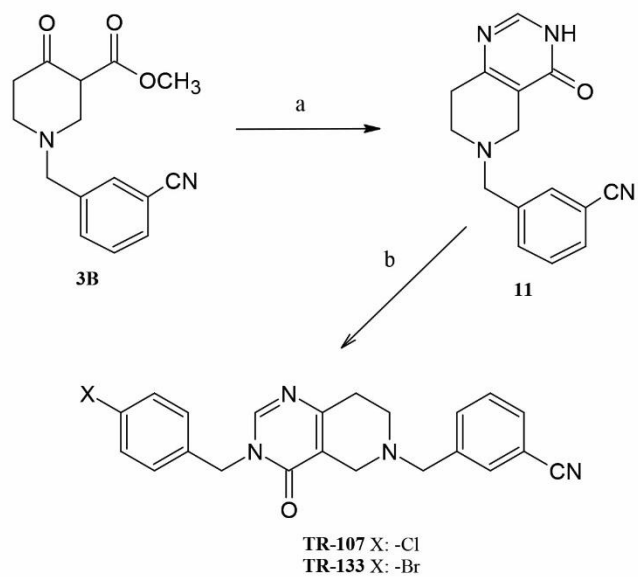

## **LEGENDS FOR SUPPLEMENTAL TABLES**

**Table S1. X-ray data collection and refinement statistics for complexes of human ClpP with TR compounds, Related to Figure 3.**

**Table S2. Buried surface area for different small molecule activators upon complex formation with human ClpP, Related to Figure 4.**

**Table S3. Proteins and protein complexes detected in both HYTANE and BioID, Related to Figure 5.**

**Table S1****Table S1.** X-ray data collection and refinement statistics for complexes of human ClpP with TR compounds, Related to Figure 3.

| TR compound<br>PDB ID                                                | TR-27<br>7UVM                                  | TR-57<br>7UVN                                  | TR-65<br>7UVR                                  | TR-107<br>7UVU                                 | TR-133<br>7UW0                                 |
|----------------------------------------------------------------------|------------------------------------------------|------------------------------------------------|------------------------------------------------|------------------------------------------------|------------------------------------------------|
| <b>Data collection</b>                                               |                                                |                                                |                                                |                                                |                                                |
| Space group                                                          | C 1 2 1                                        | C 1 2 1                                        | C 1 2 1                                        | C 1 2 1                                        | I 1 2 1                                        |
| Cell dimensions<br><i>a, b, c</i> (Å)<br>$\alpha, \beta, \gamma$ (°) | 143.15, 153.72, 105.10<br>90.00, 117.76, 90.00 | 142.10, 153.04, 104.70<br>90.00, 117.92, 90.00 | 142.17, 152.52, 104.27<br>90.00, 118.10, 90.00 | 142.15, 152.66, 104.34<br>90.00, 118.00, 90.00 | 105.66, 153.80, 133.21<br>90.00, 107.03, 90.00 |
| Resolution (Å)                                                       | 29.62 - 2.19<br>(2.25 - 2.19)                  | 50.00 - 3.10<br>(3.15 - 3.10)                  | 29.35 - 2.86<br>(2.93 - 2.86)                  | 50.00 - 3.30<br>(3.36 - 3.30)                  | 93.62 - 2.80<br>(2.89 - 2.80)                  |
| <i>I</i> / $\sigma$ <i>I</i>                                         | 5.2/1.3                                        | 11.4/1.8                                       | 6.0/1.4                                        | 4.7/1.2                                        | 4.2/1.7                                        |
| Rmerge                                                               | 0.235 (0.737)                                  | 0.285 (1.065)                                  | 0.207 (0.837)                                  | 0.205 (0.879)                                  | 0.354 (0.963)                                  |
| CC 1/2                                                               | 0.987 (0.716)                                  | 0.992 (0.705)                                  | 0.987 (0.628)                                  | 0.964 (0.570)                                  | 0.805 (0.420)                                  |
| Completeness (%)                                                     | 99.2 (90.2)                                    | 99.7 (99.4)                                    | 99.2 (91.9)                                    | 98.7 (96.6)                                    | 95.2 (94.3)                                    |
| Redundancy                                                           | 7.0 (5.9)                                      | 7.2 (7.3)                                      | 5.2 (4.8)                                      | 6.6 (6.1)                                      | 4.9 (4.9)                                      |
| <b>Refinement</b>                                                    |                                                |                                                |                                                |                                                |                                                |
| Resolution (Å)                                                       | 29.40 - 2.19                                   | 50.00 - 3.10                                   | 29.17 - 2.86                                   | 46.06 - 3.30                                   | 50.51 - 2.80                                   |
| No. reflections                                                      | 102,283 (9,495)                                | 35,028<br>(3,309)                              | 44,927<br>(4,367)                              | 29,842<br>(2,427)                              | 47,166<br>(4,706)                              |
| <i>R</i> <sub>work</sub> / <i>R</i> <sub>free</sub>                  | 0.1971/0.2370                                  | 0.2291/0.2823                                  | 0.2028/0.2526                                  | 0.1900/0.2599                                  | 0.2606/0.3080                                  |
| No. of atoms                                                         |                                                |                                                |                                                |                                                |                                                |
| Macromolecules                                                       | 9,616                                          | 9,809                                          | 9,547                                          | 9,763                                          | 9,963                                          |
| Ligands                                                              | 378                                            | 210                                            | 217                                            | 196                                            | 196                                            |
| Solvent                                                              | 428                                            | 238                                            | 110                                            | 125                                            | 70                                             |
| B-factors (Å <sup>2</sup> )                                          |                                                |                                                |                                                |                                                |                                                |
| Protein                                                              | 43.30                                          | 51.55                                          | 47.02                                          | 49.37                                          | 23.77                                          |
| Ligands                                                              | 42.76                                          | 49.87                                          | 45.34                                          | 48.32                                          | 24.08                                          |
| Water                                                                | 46.60                                          | 48.71                                          | 41.28                                          | 38.96                                          | 12.56                                          |
| r. m. s. d.                                                          |                                                |                                                |                                                |                                                |                                                |
| Bond lengths (Å)                                                     | 0.015                                          | 0.002                                          | 0.012                                          | 0.012                                          | 0.002                                          |
| Bond angles (°)                                                      | 1.470                                          | 0.60                                           | 1.35                                           | 1.390                                          | 0.56                                           |
| Ramachandran                                                         |                                                |                                                |                                                |                                                |                                                |
| Favored                                                              | 97.07                                          | 95.65                                          | 95.26                                          | 91.36                                          | 96.26                                          |
| Allowed                                                              | 2.68                                           | 3.86                                           | 4.32                                           | 7.57                                           | 3.49                                           |
| Disallowed                                                           | 0.25                                           | 0.49                                           | 0.42                                           | 0.00                                           | 0.25                                           |

Statistics for the highest-resolution shell are shown in parentheses.



**Table S2**

**Table S2.** Buried surface area for different small molecule activators upon complex formation with human ClpP, Related to Figure 4.

| <b>Small molecule</b> | <b>Surface area (Å<sup>2</sup>)</b> | <b>Buried surface area upon binding (Å<sup>2</sup>)</b> | <b>Percent buried (%)</b> |
|-----------------------|-------------------------------------|---------------------------------------------------------|---------------------------|
| TR-27                 | 665                                 | 564                                                     | 84.8                      |
| TR-57                 | 642                                 | 530                                                     | 82.6                      |
| TR-65                 | 650                                 | 534                                                     | 82.2                      |
| TR-107                | 610                                 | 511                                                     | 83.8                      |
| TR-133                | 619                                 | 522                                                     | 84.3                      |
| ONC201                | 607                                 | 495                                                     | 81.5                      |
| ADEP-28               | 951                                 | 707                                                     | 74.3                      |
| ZG111                 | 758                                 | 639                                                     | 84.3                      |
| D9*                   | 596**                               | 516                                                     | 86.6                      |

\*Y118A mutant of human ClpP was used in crystallization with small molecule.

\*\*Considering major pose of small molecule in coordinate file PDB id 6H23.

**Table S3****TABLE S3.** Proteins and protein complexes detected in both HYTANE and BioID, Related to Figure 5.

| Protein / Protein Complex                           | Functional Category           | Protein / Protein Subunit | HYTANE (Native or Novel) | BioID <sup>1</sup> |
|-----------------------------------------------------|-------------------------------|---------------------------|--------------------------|--------------------|
| NADH:ubiquinone dehydrogenase (Complex I)           | Energy metabolism (OXPHOS)    | NDUFA2                    |                          | ↓                  |
|                                                     |                               | NDUFA6                    |                          | ↓                  |
|                                                     |                               | NDUFA7                    |                          | ↓                  |
|                                                     |                               | NDUFA12                   | Native↓                  | ↓                  |
|                                                     |                               | NDUFB4                    | Native↓                  |                    |
|                                                     |                               | NDUFB8                    | Native↓                  |                    |
|                                                     |                               | NDUFS2*                   | Native↓                  | ↓                  |
|                                                     |                               | NDUFS4                    |                          | ↓                  |
|                                                     |                               | NDUFS6                    |                          | ↓                  |
|                                                     |                               | NDUFS7                    |                          | ↓                  |
|                                                     |                               | NDUFS8                    | Native↓                  | ↓                  |
| NDUFV2                                              | Novel↓                        | ↓                         |                          |                    |
| NDUFV3                                              |                               | ↓                         |                          |                    |
| Succinate dehydrogenase (Complex II)                | Energy metabolism (OXPHOS)    | SDHA                      |                          | ↓                  |
|                                                     |                               | SDHB                      | Native↓                  | ↓                  |
| Ubiquinol-cytochrome c oxidoreductase (Complex III) | Energy metabolism (OXPHOS)    | UQCRB                     | Native↓                  | ↓                  |
|                                                     |                               | UQCRC1                    | Native↓                  |                    |
| Cytochrome c oxidase (complex IV)                   | Energy metabolism (OXPHOS)    | COX4I1                    | Native↓                  | ↓                  |
|                                                     |                               | COX5A                     |                          | ↓                  |
|                                                     |                               | COX5B                     | Native↓                  | ↓                  |
|                                                     |                               | COX6C                     | Native↓                  |                    |
| 2-Oxoglytarate dehydrogenase complex                | Energy metabolism (TCA cycle) | OGDH                      |                          | ↓                  |
|                                                     |                               | DLST                      | Native↓                  |                    |
| GTP-specific succinyl-CoA synthase complex          | Energy metabolism (TCA cycle) | SUCLG1                    |                          | ↓                  |
|                                                     |                               | SUCLG2                    | Native↓                  | ↓                  |
| Malate dehydrogenase                                | Energy metabolism (TCA cycle) | MDH2                      | Native↓                  | ↓                  |
| Isocitrate dehydrogenase                            | Energy metabolism (TCA cycle) | IDH3A                     |                          | ↓                  |
|                                                     |                               | IDH3G                     | Native↓                  |                    |
| Complex I $\alpha$ -subcomplex assembly factor 2    | Molecular chaperone           | NDUFAF2                   | Native↓                  | ↓                  |
| Complex I $\alpha$ -subcomplex assembly factor 3    | Molecular chaperone           | NDUFAF3                   | Novel↓                   | ↓                  |
|                                                     |                               | NDUFS2*                   | Native↓                  | ↓                  |
| Mitochondrial ribosome 39S (large) subunit          | Mitochondrial translation     | MRPL4                     | Novel↓                   |                    |
|                                                     |                               | MRPL10                    |                          | ↓                  |
|                                                     |                               | MRPL12                    |                          | ↓                  |
|                                                     |                               | MRPL14                    |                          | ↓                  |
|                                                     |                               | MRPL19                    |                          | ↓                  |
|                                                     |                               | MRPL21                    |                          | ↓                  |
|                                                     |                               | MRPL40                    |                          | ↓                  |

|                                                                                                                               |                                  |         |          |   |
|-------------------------------------------------------------------------------------------------------------------------------|----------------------------------|---------|----------|---|
|                                                                                                                               |                                  | MRPL42  | Novel ↓  |   |
|                                                                                                                               |                                  | MRPL44  |          | ↓ |
|                                                                                                                               |                                  | MRPL45  |          | ↓ |
|                                                                                                                               |                                  | MRPL46  | Novel ↓  | ↓ |
|                                                                                                                               |                                  | MRPL47  |          | ↓ |
|                                                                                                                               |                                  | MRPL48  |          | ↓ |
|                                                                                                                               |                                  | MRPL49  | Novel ↓  |   |
|                                                                                                                               |                                  | MRPL54  |          | ↓ |
|                                                                                                                               |                                  | MRPL55  |          | ↓ |
|                                                                                                                               |                                  |         |          |   |
|                                                                                                                               |                                  | MRPS2   | Novel ↓  |   |
|                                                                                                                               |                                  | MRPS6   |          | ↓ |
|                                                                                                                               |                                  | MRPS7   |          | ↓ |
|                                                                                                                               |                                  | MRPS11  |          | ↓ |
|                                                                                                                               |                                  | MRPS15  |          | ↓ |
|                                                                                                                               |                                  | MRPS16  |          | ↓ |
|                                                                                                                               |                                  | MRPS17  |          | ↓ |
|                                                                                                                               |                                  | MRPS18A | Novel ↓  |   |
|                                                                                                                               |                                  | MRPS23  |          | ↓ |
|                                                                                                                               |                                  | MRPS24  |          | ↓ |
|                                                                                                                               |                                  | MRPS25  |          | ↓ |
|                                                                                                                               |                                  | MRPS26  |          | ↓ |
|                                                                                                                               |                                  | MRPS27  | Native ↓ |   |
|                                                                                                                               |                                  | MRPS28  | Native ↓ | ↓ |
|                                                                                                                               |                                  | MRPS29  | Novel ↓  |   |
|                                                                                                                               |                                  | MRPS35  | Novel ↓  |   |
|                                                                                                                               |                                  | MRPS36  | Novel ↓  | ↓ |
|                                                                                                                               |                                  |         |          |   |
| Mitochondrial elongation factor G                                                                                             | Mitochondrial translation        | GFM1    | Native ↓ | ↓ |
|                                                                                                                               |                                  |         |          |   |
| Mitochondrial transcription factor A                                                                                          | Mitochondrial transcription      | TFAM    | Native ↓ | ↓ |
|                                                                                                                               |                                  |         |          |   |
| Glutamate dehydrogenase 1                                                                                                     | Amino acid metabolism            | GLUD1   | Native ↓ | ↓ |
|                                                                                                                               |                                  |         |          |   |
| Hydroxyacyl-CoA dehydrogenase                                                                                                 | Lipid metabolism (β-oxidation)   | HADH    | Native ↓ | ↓ |
|                                                                                                                               |                                  |         |          |   |
| Enoyl-CoA hydratase 1                                                                                                         | Lipid metabolism (β-oxidation)   | ECHS1   | Native ↓ | ↓ |
|                                                                                                                               |                                  |         |          |   |
| Acetyl-CoA acetyltransferase 1                                                                                                | Lipid metabolism (β-oxidation)   | ACAT1   | Native ↓ | ↓ |
|                                                                                                                               |                                  |         |          |   |
| Adenosine 5'-monophosphoramidase                                                                                              | Nucleic acid metabolism (purine) | HINT2   | Novel ↓  | ↓ |
|                                                                                                                               |                                  |         |          |   |
| *NDUFS2 is found in complex with both NADH:ubiquinone dehydrogenase (Complex I) and Complex I α-subcomplex assembly factor 3. |                                  |         |          |   |

<sup>1</sup>The BioID data are derived from Ishizawa et al. (2019) *Cancer Cell* 35, 721-737, e729.

## REFERENCES

1. Rubio-Cosials, A., Sydow, J.F., Jiménez-Menéndez, N., Fernández-Millán, P., Montoya, J., Jacobs, H.T., Coll, M., Bernadó, P., and Solà, M. (2011). Human mitochondrial transcription factor A induces a U-turn structure in the light strand promoter. *Nature Structural & Molecular Biology* 18, 1281-1289. 10.1038/nsmb.2160.
